# Supplementary material
Source: PubMed Central journal article supplement (PMC5685782)
Supplement: mmc1.pdf [file mmc1.pdf]

**Biophysical Journal, Volume 113**

**Supplemental Information**

**Charge Influences Substrate Recognition and  
Self-Assembly of Hydrophobic FG Sequences**

**Wesley G. Chen, Jacob Witten, Scott C. Grindy, Niels Holten-Andersen, and Katharina Ribbeck**

# Supplementary Data S1

Purity of synthesized peptides assessed by analytical HPLC and mass spectrometry

## FGAK Peptide

Analytical HPLC

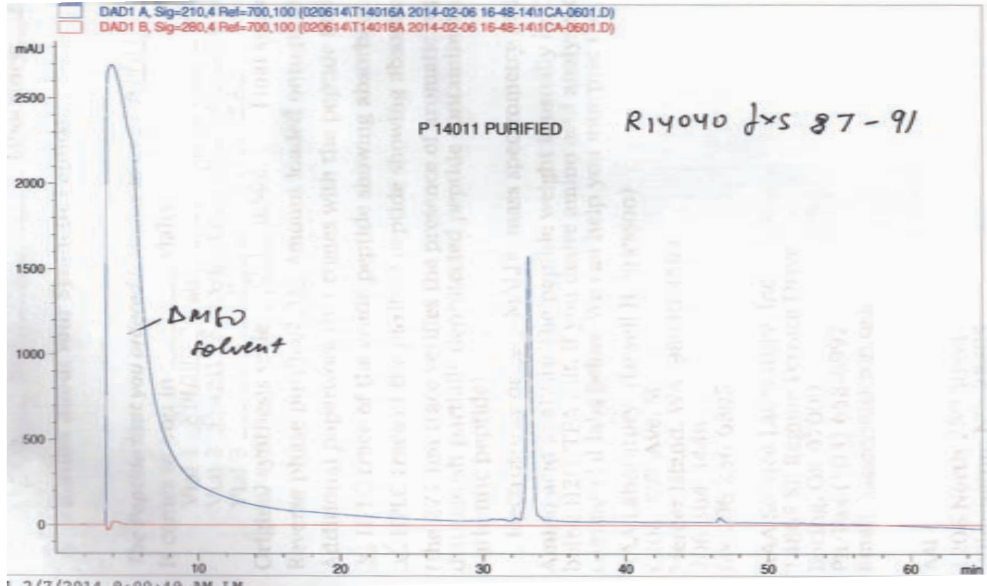

## Mass spectrometry analysis

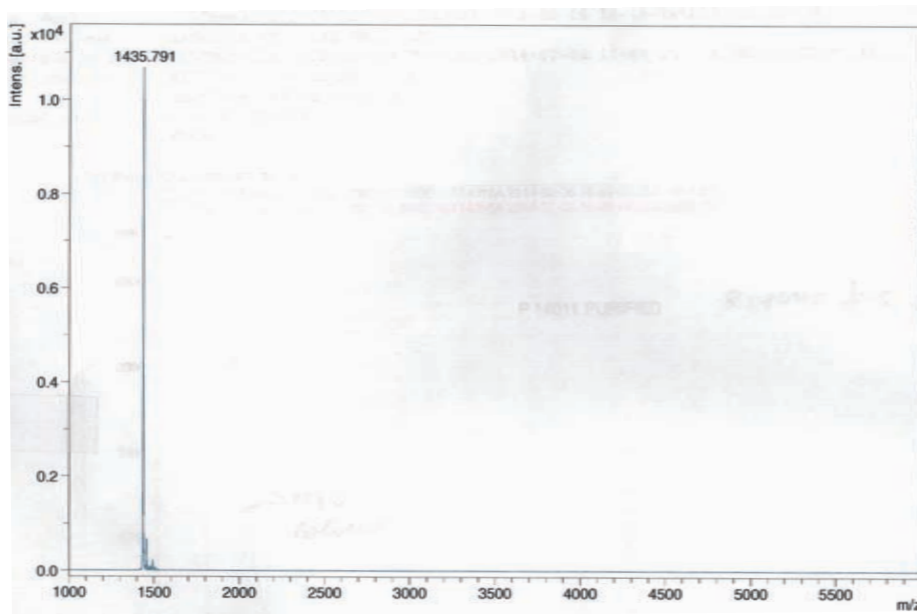

Laser repetition rate in Hz: 60 Hz  
Linear detector voltage: 2.691 kV  
Reflector detector voltage: 1.59 kV  
Ion source voltage 1: 20 kV  
Ion source voltage 2: 18.55 kV  
Ion source lens voltage: 6.5 kV  
Number of shots: 400

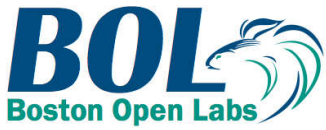

## Analysis Report

Inj. Date: 11/16/2015 12:58:58

Operator: Aiqin Wang

Product Name: P155934

Lot: QP102815KZ1E

Mobile Phase: A: 0.05% TFA in H2O

B: 0.05% TFA in 100% ACN

Grads: 21%-31%B in 20 min Flow : 1.0 ml/min

Column : Agilent ZORBAX 300SB-C18 5um 4.6\*150mm 220nm

Auto-Scaled Chromatogram

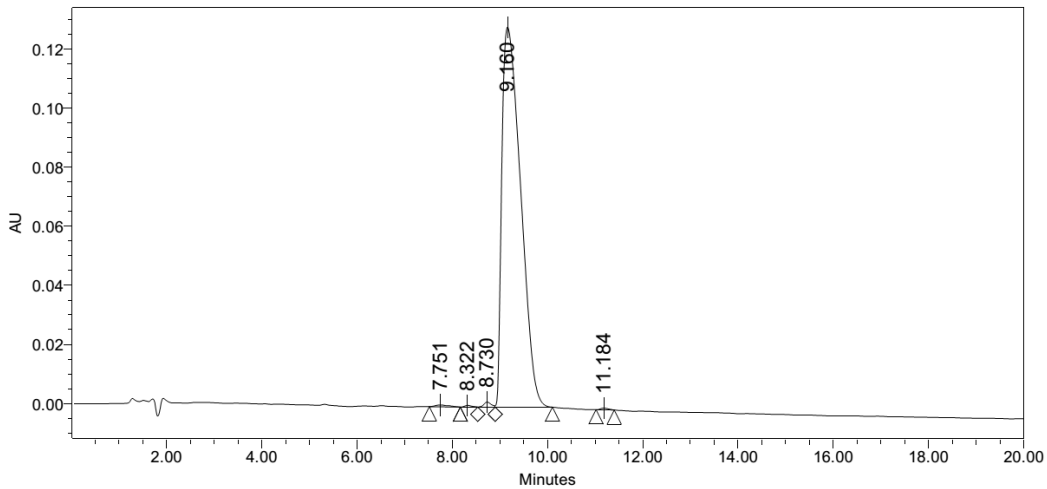

### Peak Results

|   | Retention Time (min) | Int Type | Area ( $\mu\text{V}\cdot\text{sec}$ ) | Height ( $\mu\text{V}$ ) | Width (sec) | % Area |
|---|----------------------|----------|---------------------------------------|--------------------------|-------------|--------|
| 1 | 7.751                | BB       | 12262                                 | 590                      | 39.000      | 0.34   |
| 2 | 8.322                | BV       | 6094                                  | 572                      | 22.000      | 0.17   |
| 3 | 8.730                | VV       | 18379                                 | 1727                     | 22.000      | 0.52   |
| 4 | 9.160                | VB       | 3515511                               | 128499                   | 72.000      | 98.78  |
| 5 | 11.184               | BB       | 6614                                  | 609                      | 23.000      | 0.19   |

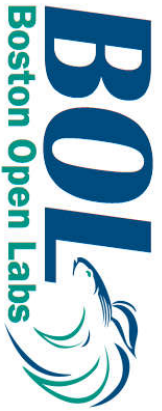

Product Name: P155934  
Lot: QP102815KZ1E  
MW: 1435.64  
Date: 2015-11-16

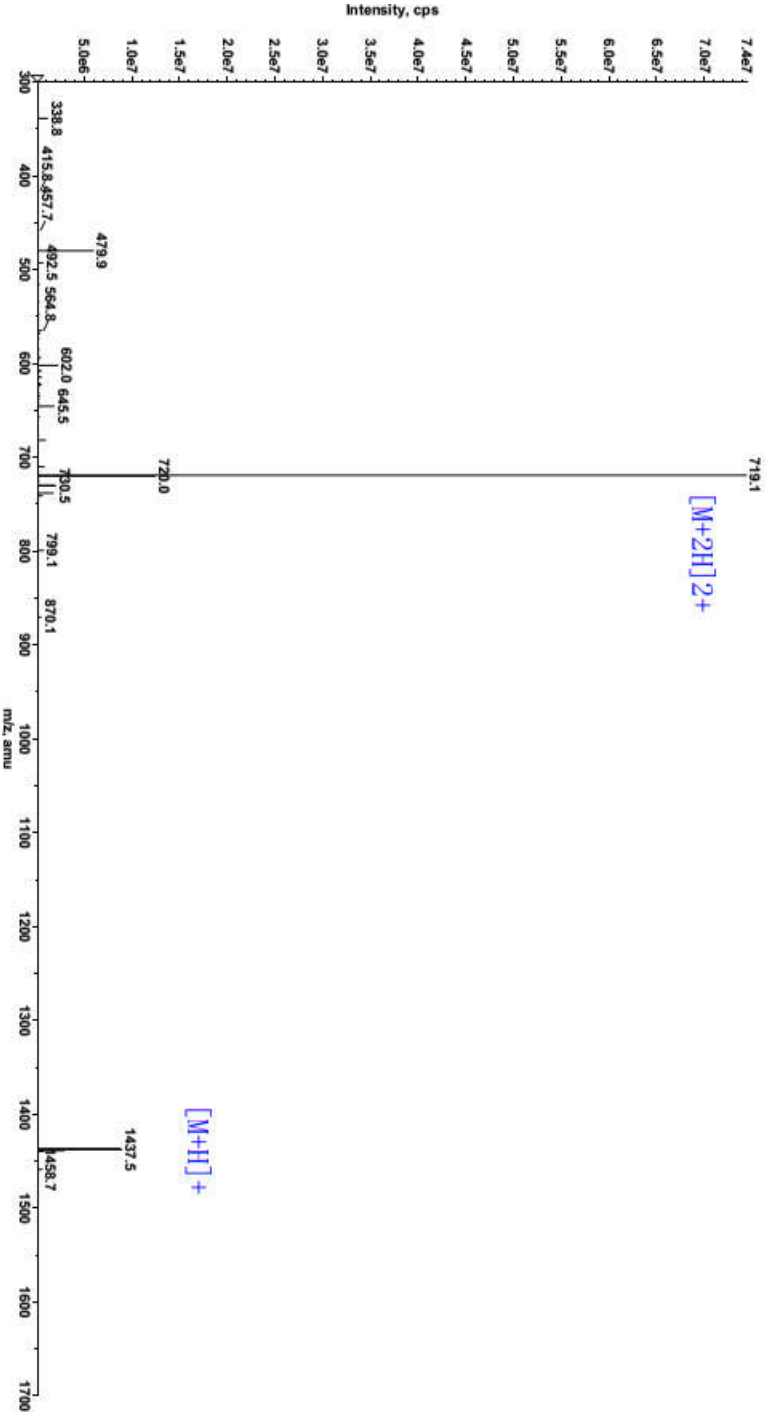

763-D Concord Avenue, Cambridge, MA 02138 • Phone: (877) 299-8500 • Fax: (617) 800-0997  
Email: [contactus@bostonopenlab.com](mailto:contactus@bostonopenlab.com) • [www.bostonopenlabs.com](http://www.bostonopenlabs.com)



## Analysis Report

Inj. Date: 11/16/2015 11:28:06

Operator: Aiqin Wang

Product Name: P155935

Lot: QP102815KZ1F

Mobile Phase: A: 0.05% TFA in H2O

B: 0.05% TFA in 100% ACN

Grads: 23%-33%B in 20 min Flow : 1.0 ml/min

Column : Agilent ZORBAX 300SB-C18 5um 4.6\*150mm 220nm

### Auto-Scaled Chromatogram

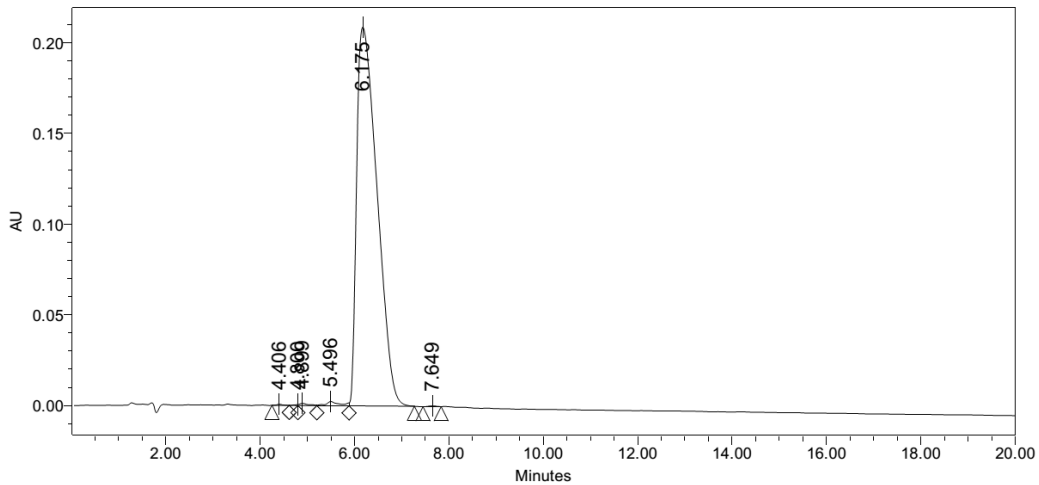

### Peak Results

|   | Retention Time (min) | Int Type | Area (μV*sec) | Height (μV) | Width (sec) | % Area |
|---|----------------------|----------|---------------|-------------|-------------|--------|
| 1 | 4.406                | BV       | 5127          | 574         | 22.000      | 0.08   |
| 2 | 4.800                | VV       | 2555          | 496         | 11.000      | 0.04   |
| 3 | 4.899                | VV       | 15792         | 1193        | 24.000      | 0.25   |
| 4 | 5.496                | Vv       | 45962         | 2333        | 41.000      | 0.73   |
| 5 | 6.175                | vB       | 6256502       | 208887      | 83.000      | 98.83  |
| 6 | 7.649                | BB       | 4769          | 436         | 23.000      | 0.08   |

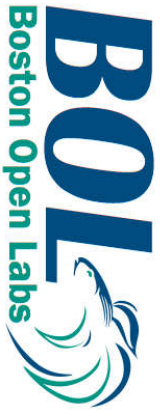

Product Name: P155935  
Lot: QP102815KZ1F  
MW: 1435.64  
Date: 2015-11-16

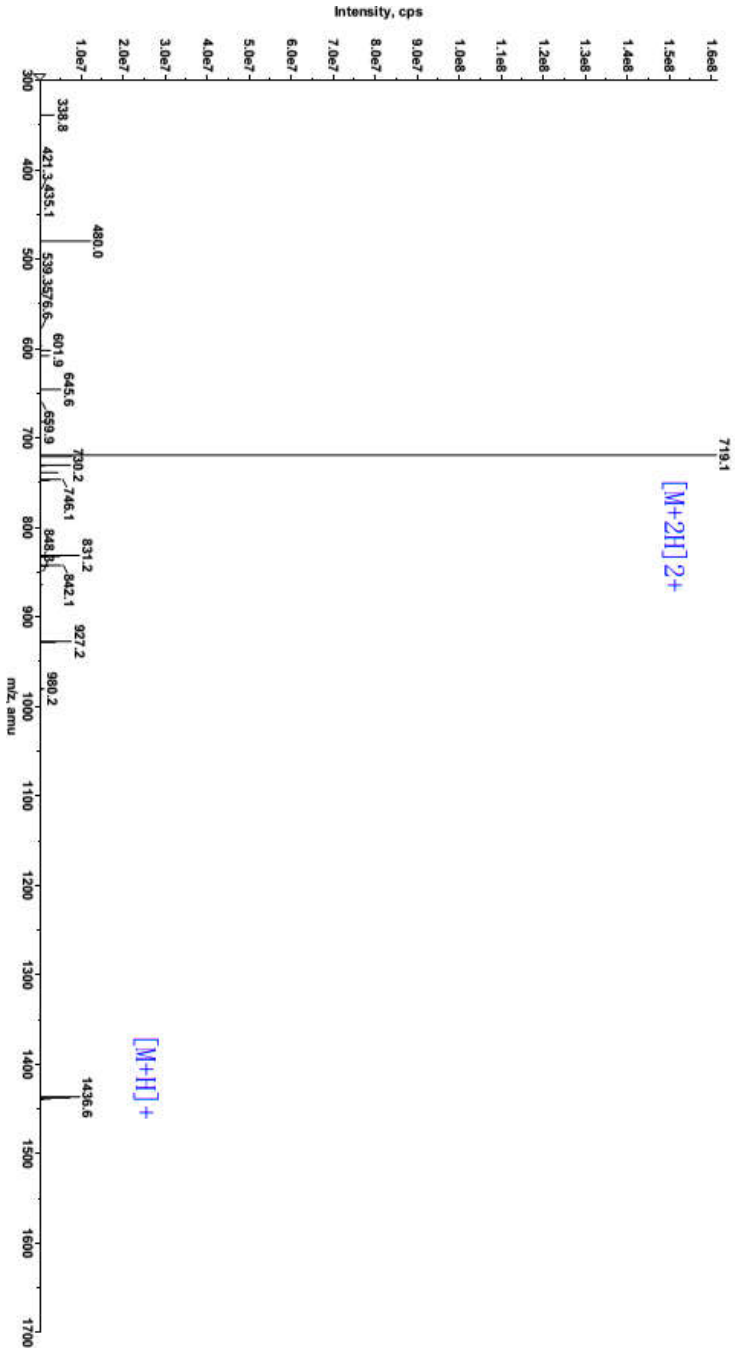

763-D Concord Avenue, Cambridge, MA 02138 • Phone: (877) 299-8500 • Fax: (617) 800-0997  
Email: [contactus@bostonopenlab.com](mailto:contactus@bostonopenlab.com) • [www.bostonopenlabs.com](http://www.bostonopenlabs.com)

# FGAE Peptide

## Analytical HPLC

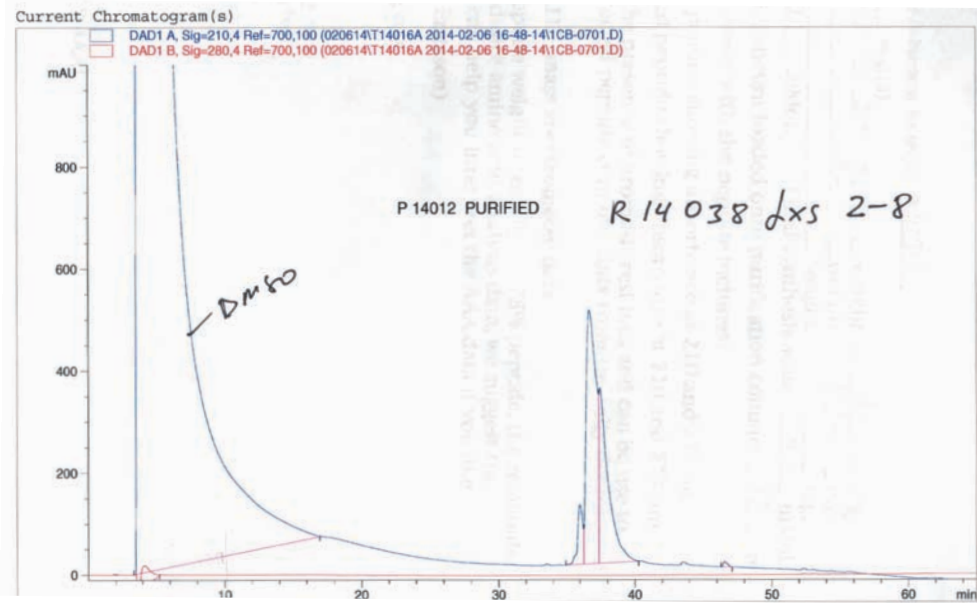

## Mass spectrometry analysis

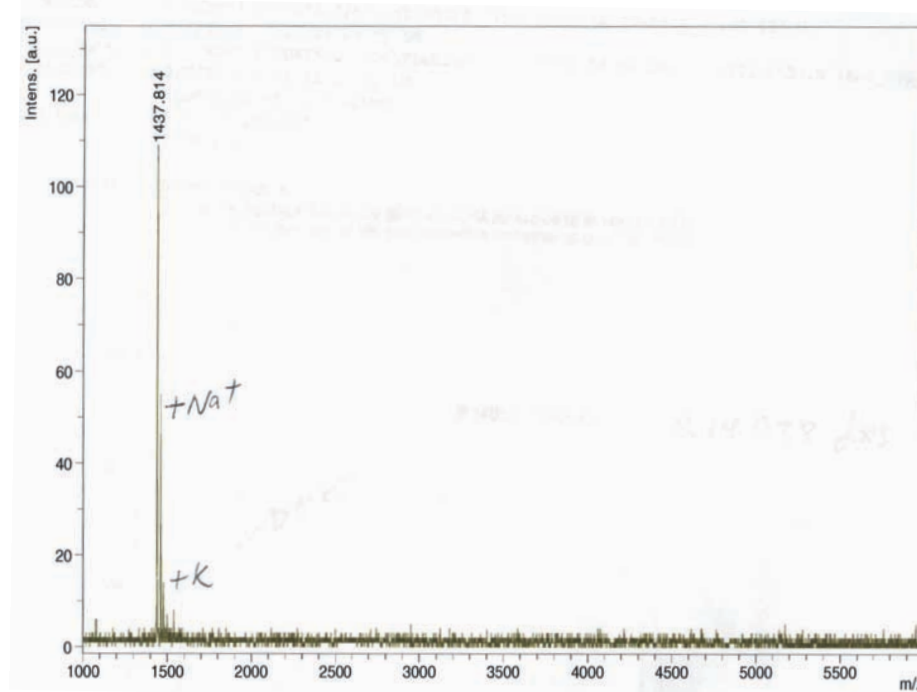

Laser repetition rate in Hz: 60 Hz  
Linear detector voltage: 2.691 kV  
Reflector detector voltage: 1.59 kV  
Ion source voltage 1: 20 kV  
Ion source voltage 2: 18.55 kV  
Ion source lens voltage: 6.5 kV  
Number of shots: 400

# FGAR Peptide

## Analytical HPLC

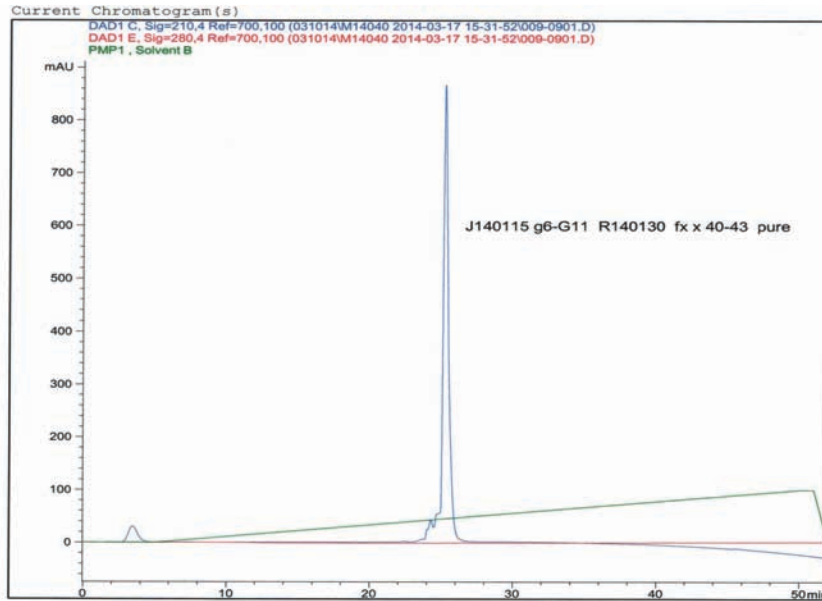

## Mass spectrometry analysis

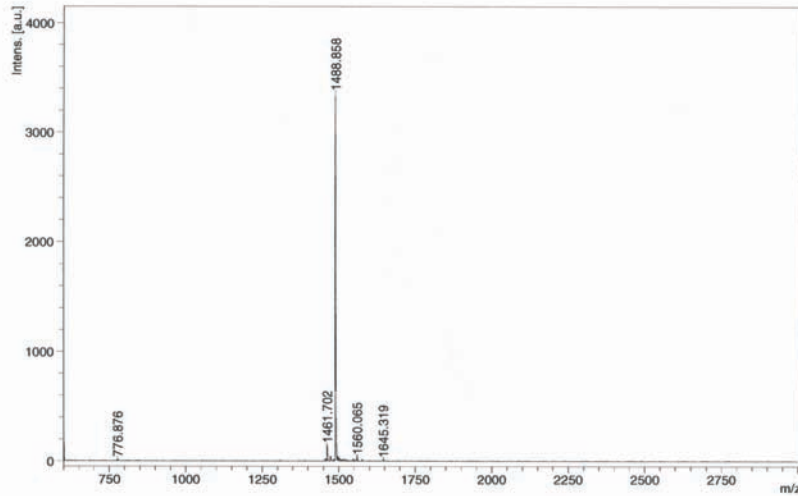

Laser repetition rate in Hz: 60 Hz  
Linear detector voltage: 2.691 kV  
Reflector detector voltage: 1.59 kV  
Ion source voltage 1: 20 kV  
Ion source voltage 2: 18.55 kV  
Ion source lens voltage: 6.5 kV  
Number of shots: 400



## FGAD peptide

### Analytical HPLC

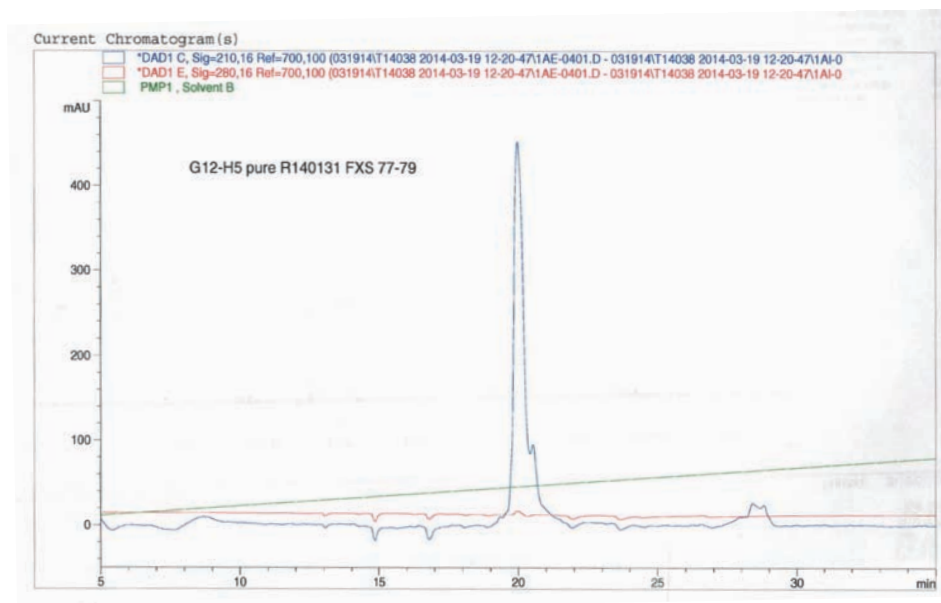

### Mass spectrometry analysis

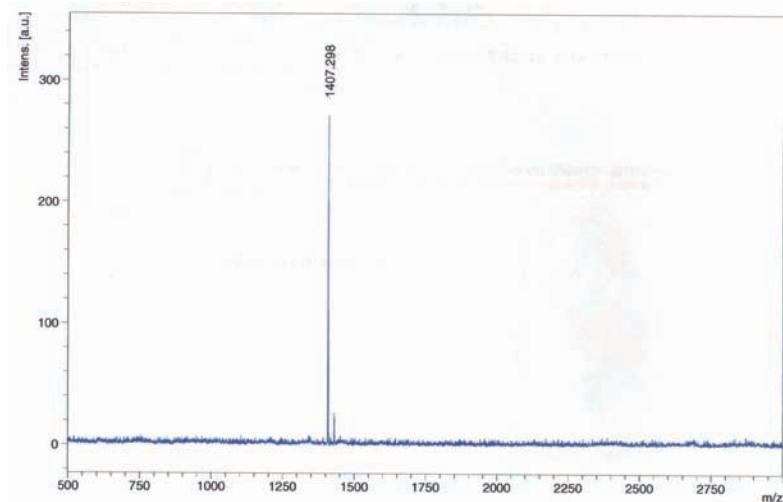

Laser repetition rate in Hz: 60 Hz  
Linear detector voltage: 2.691 kV  
Reflector detector voltage: 1.59 kV  
Ion source voltage 1: 20 kV  
Ion source voltage 2: 18.55 kV  
Ion source lens voltage: 6.5 kV  
Number of shots: 400

# FGAS Peptide

## Analytical HPLC

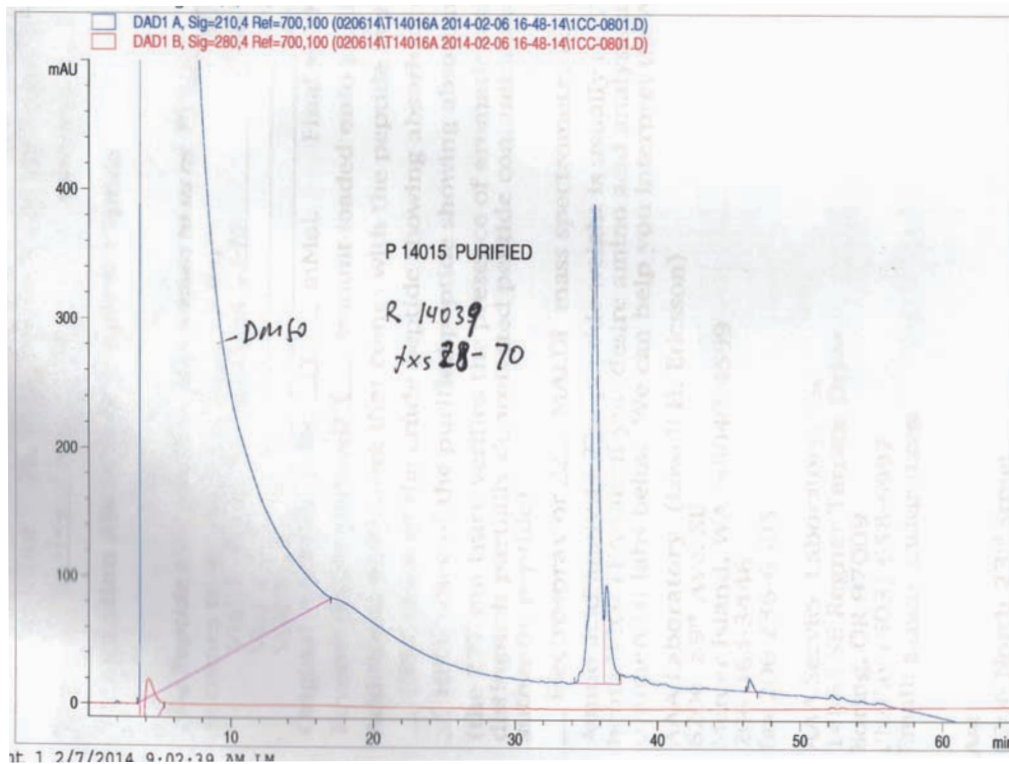

## Mass spectrometry analysis

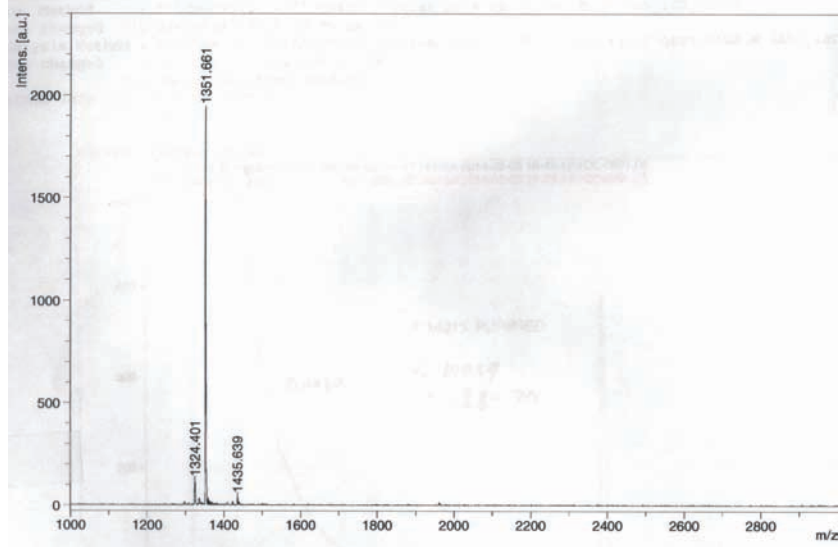

Laser repetition rate in Hz: 60 Hz  
Linear detector voltage: 2.691 kV  
Reflector detector voltage: 1.59 kV  
Ion source voltage 1: 20 kV  
Ion source voltage 2: 18.55 kV  
Ion source lens voltage: 6.5 kV  
Number of shots: 400

# SGAK Peptide

## Analytical HPLC

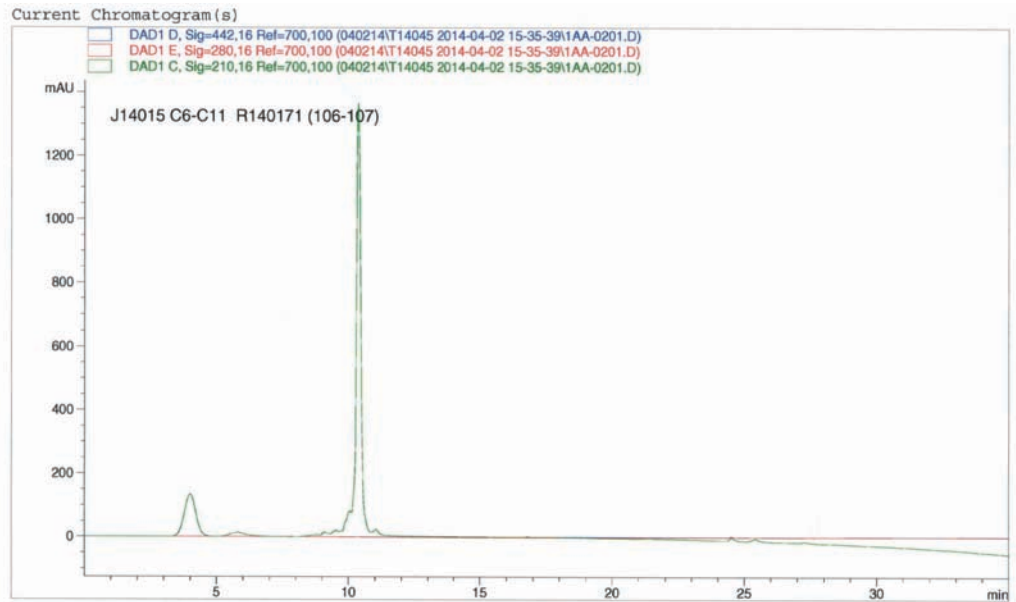

## Mass spectrometry analysis

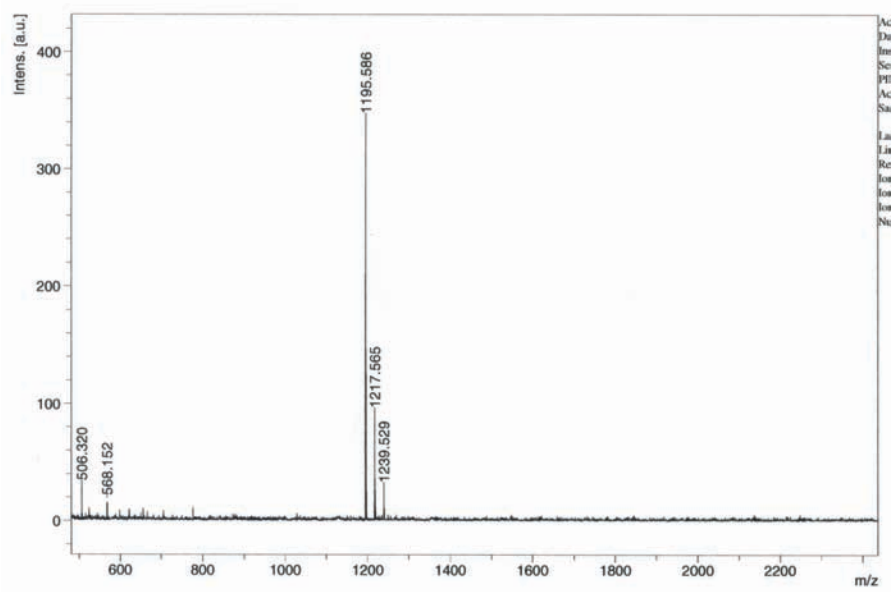

Laser repetition rate in Hz: 60 Hz  
Linear detector voltage: 2.691 kV  
Reflector detector voltage: 1.59 kV  
Ion source voltage 1: 20 kV  
Ion source voltage 2: 18.55 kV  
Ion source lens voltage: 6.5 kV  
Number of shots: 400

# Nsp1 Consensus Peptide

## Analytical HPLC

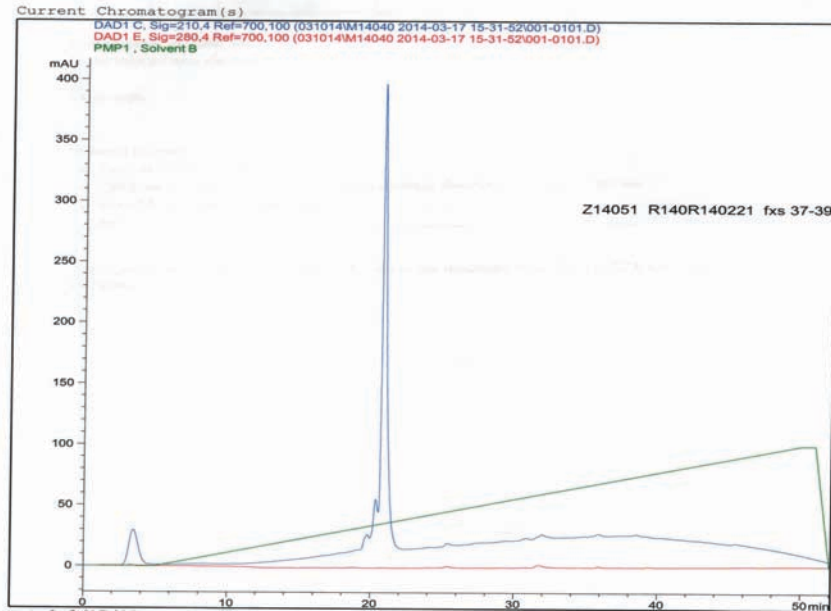

## Mass spectrometry analysis

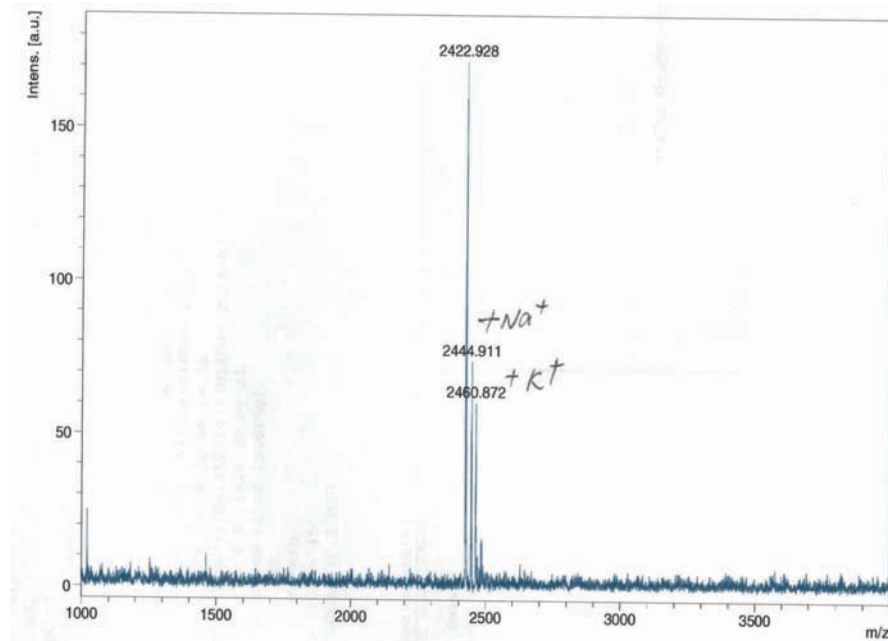

Laser repetition rate in Hz: 60 Hz  
Linear detector voltage: 2.691 kV  
Reflector detector voltage: 1.59 kV  
Ion source voltage 1: 20 kV  
Ion source voltage 2: 18.55 kV  
Ion source lens voltage: 6.5 kV  
Number of shots: 400

# Hydrophilic (-) peptide reporter with N-terminal FAM label

## Analytical HPLC

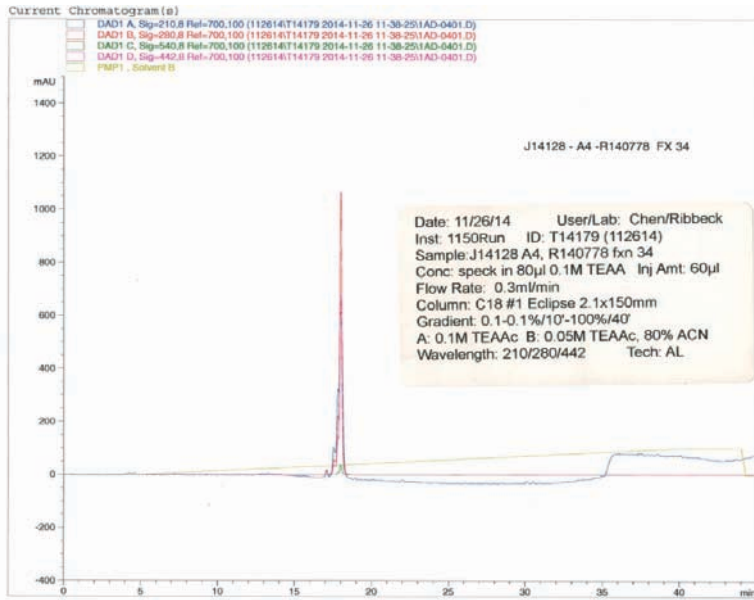

## Mass spectrometry analysis

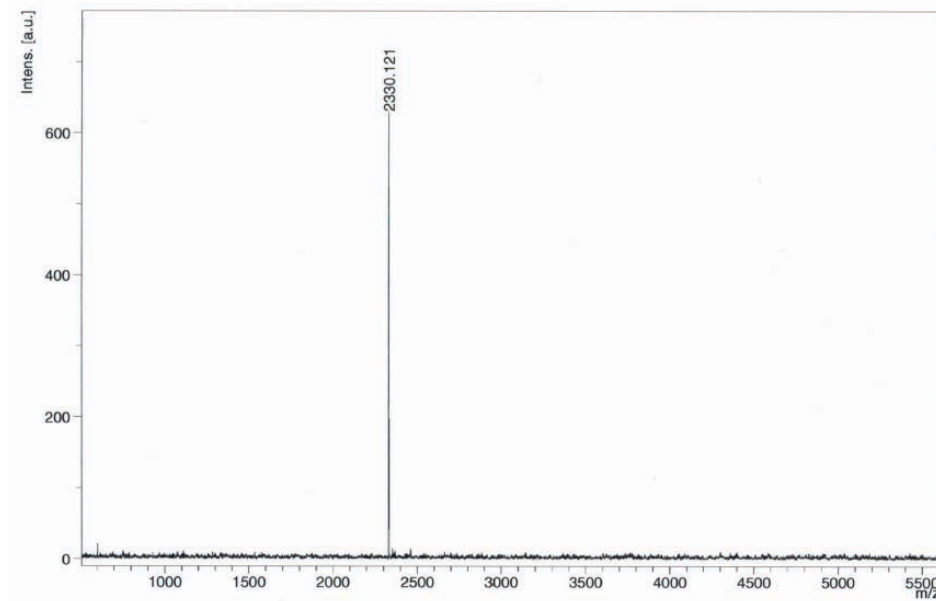

Laser repetition rate in Hz: 60 Hz  
Linear detector voltage: 2.691 kV  
Reflector detector voltage: 1.59 kV  
Ion source voltage 1: 20 kV  
Ion source voltage 2: 18.55 kV  
Ion source lens voltage: 6.5 kV  
Number of shots: 400

## Hydrophilic (+) Peptide with N-terminal FAM labeling

### Analytical HPLC

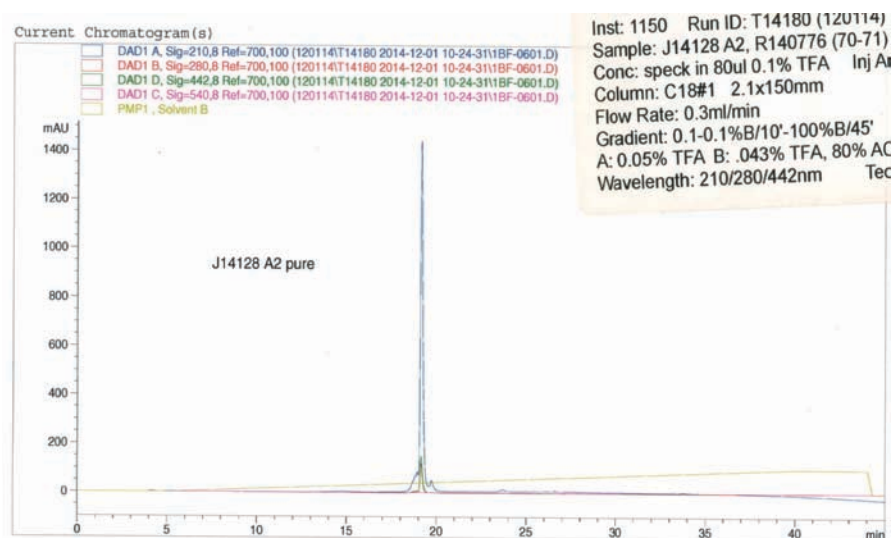

### Mass spectrometry analysis

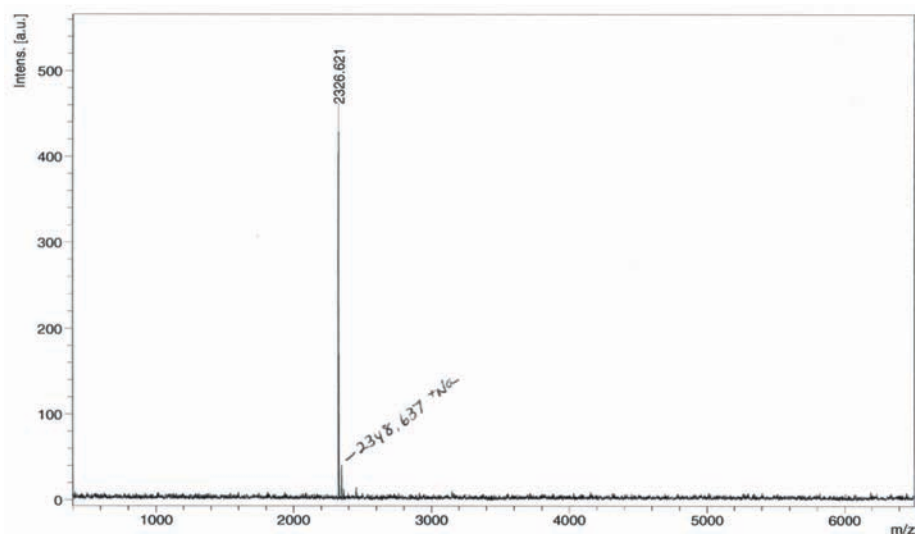

Laser repetition rate in Hz: 60 Hz  
Linear detector voltage: 2.691 kV  
Reflector detector voltage: 1.59 kV  
Ion source voltage 1: 20 kV  
Ion source voltage 2: 18.55 kV  
Ion source lens voltage: 6.5 kV  
Number of shots: 400

# Hydrophobic (-) Reporter Peptides with N-terminal FAM

## Analytical HPLC

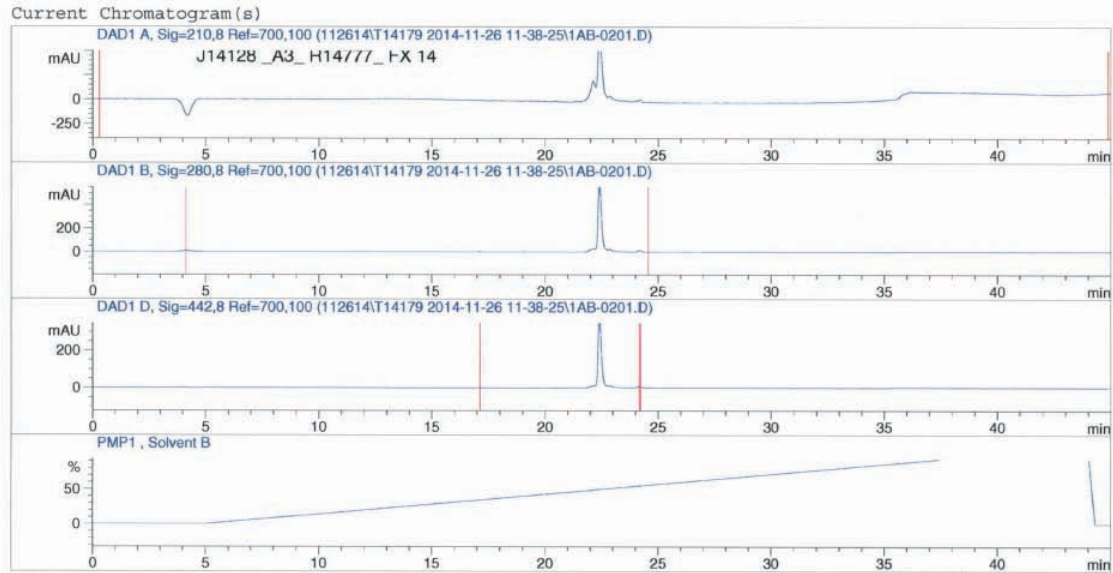

## Mass spectrometry analysis

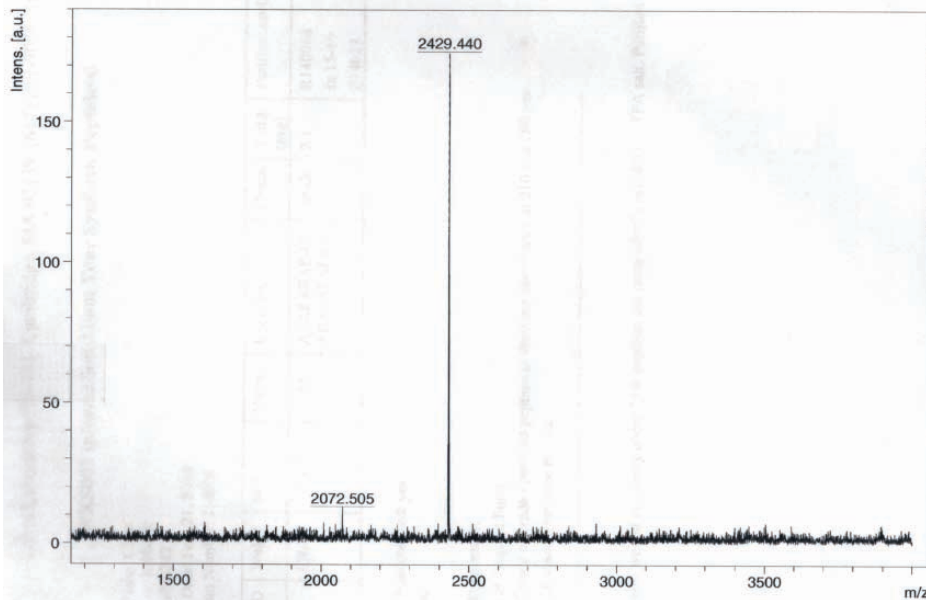

Ac  
Du  
In  
Sc  
PI  
Ac  
Sa  
La  
Li  
Rc  
for  
for  
for  
No

Laser repetition rate in Hz: 60 Hz  
Linear detector voltage: 2.691 kV  
Reflector detector voltage: 1.59 kV  
Ion source voltage 1: 20 kV  
Ion source voltage 2: 18.55 kV  
Ion source lens voltage: 6.5 kV  
Number of shots: 400



# Hydrophobic (+) Reporter Peptide with N-terminal FAM

## Analytical HPLC

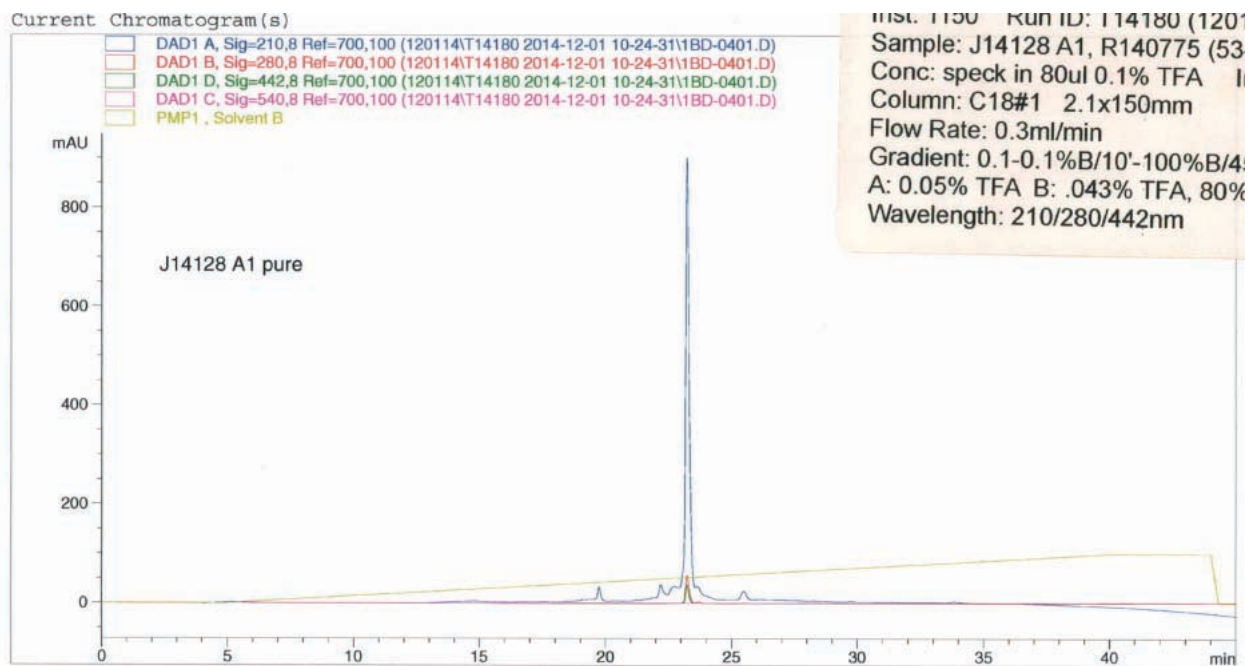

## Mass spectrometry analysis

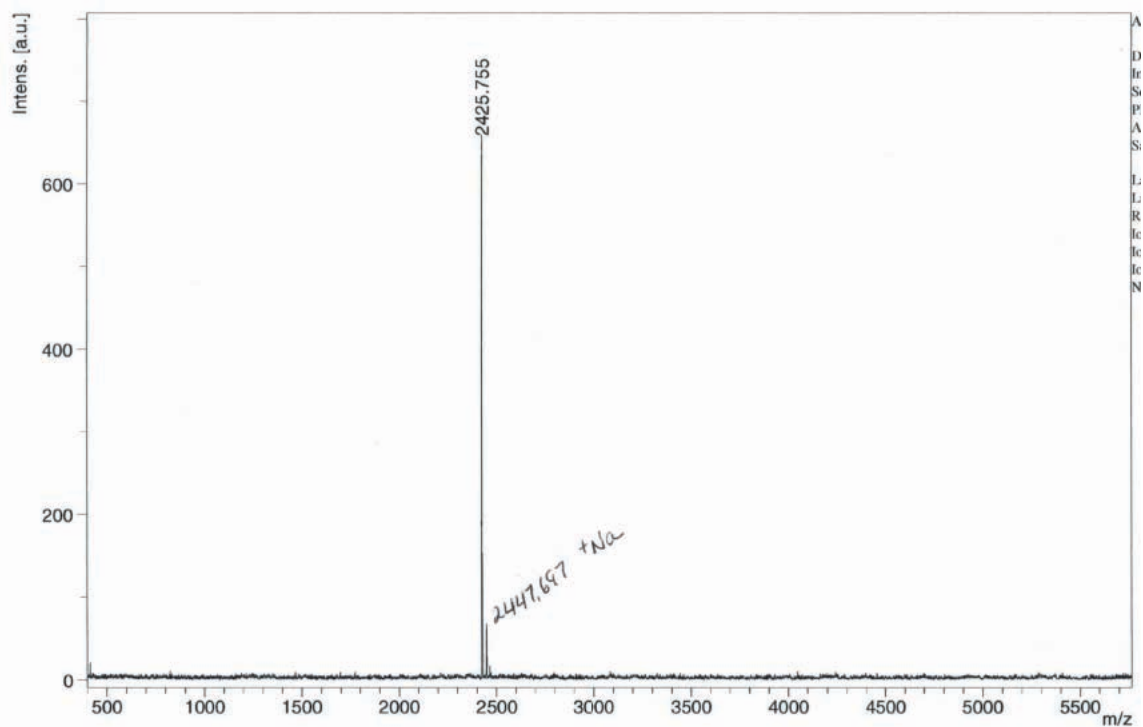



# Hydrophobic (-W) peptide with N-terminal FAM labeling

HPLC Purification. Fraction 35 was collected for mass spectrometry and diffusion analysis.

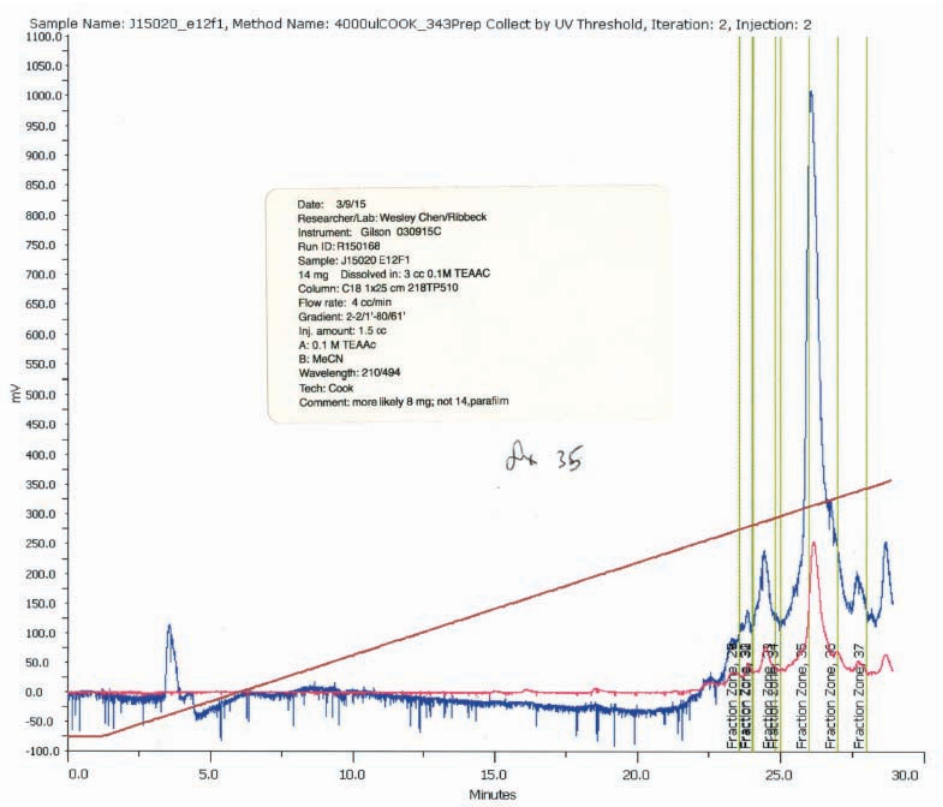

## Mass spectrometry analysis

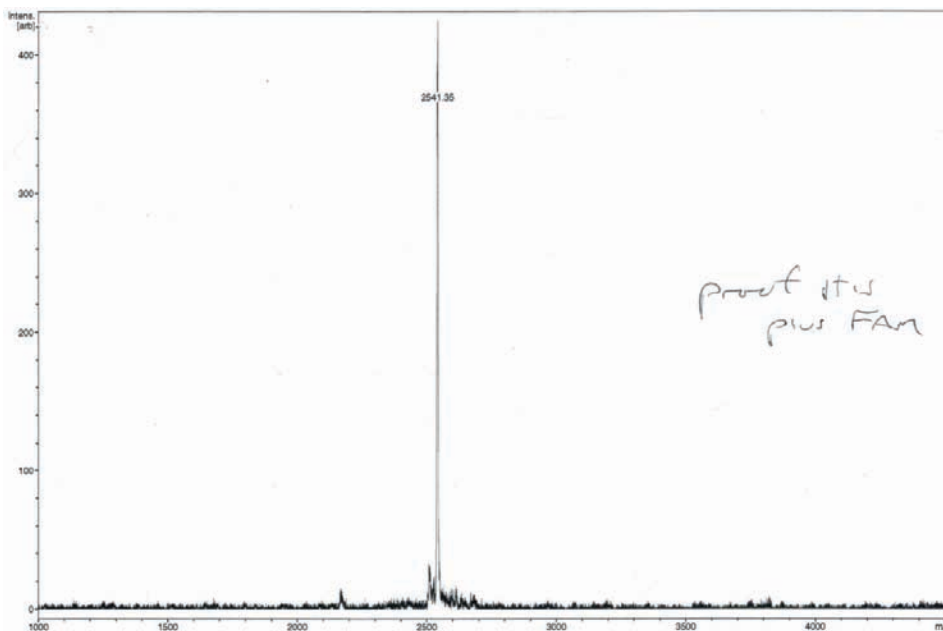

Laser repetition rate in Hz: 60 Hz  
Linear detector voltage: 2.691 kV  
Reflector detector voltage: 1.59 kV  
Ion source voltage 1: 20 kV  
Ion source voltage 2: 18.55 kV  
Ion source lens voltage: 6.5 kV  
Number of shots: 400

# Hydrophobic (+W) peptide with N-terminal FAM labeling

## Analytical HPLC

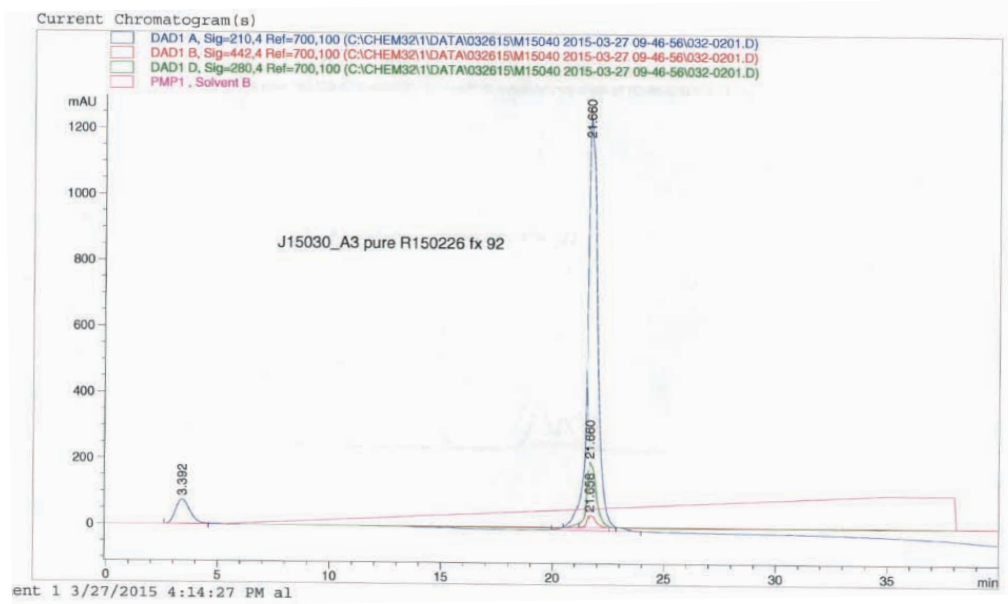

## Mass spectrometry analysis

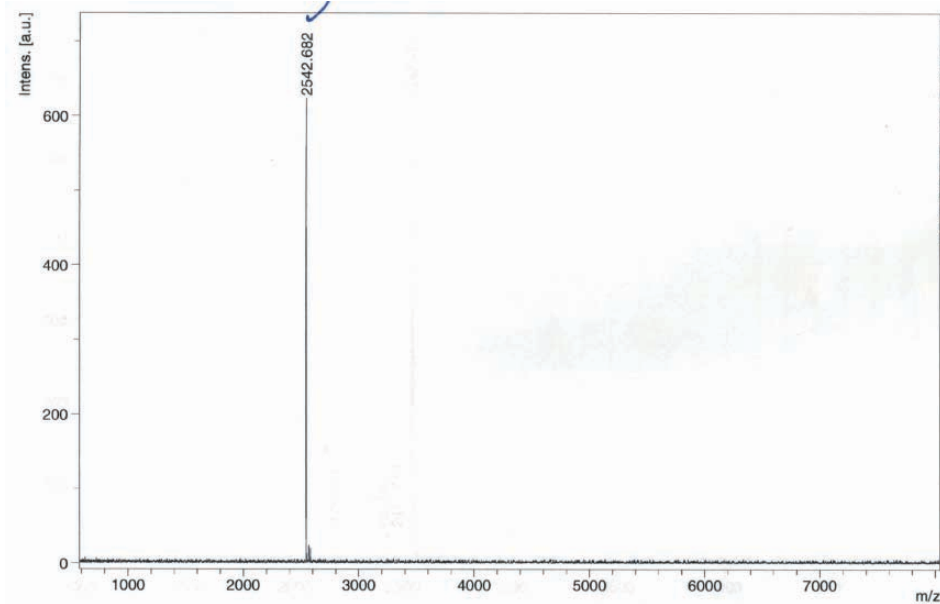

Laser repetition rate in Hz: 60 Hz  
Linear detector voltage: 2.691 kV  
Reflector detector voltage: 1.59 kV  
Ion source voltage 1: 20 kV  
Ion source voltage 2: 18.55 kV  
Ion source lens voltage: 6.5 kV  
Number of shots: 400

## Supplementary Figure S2

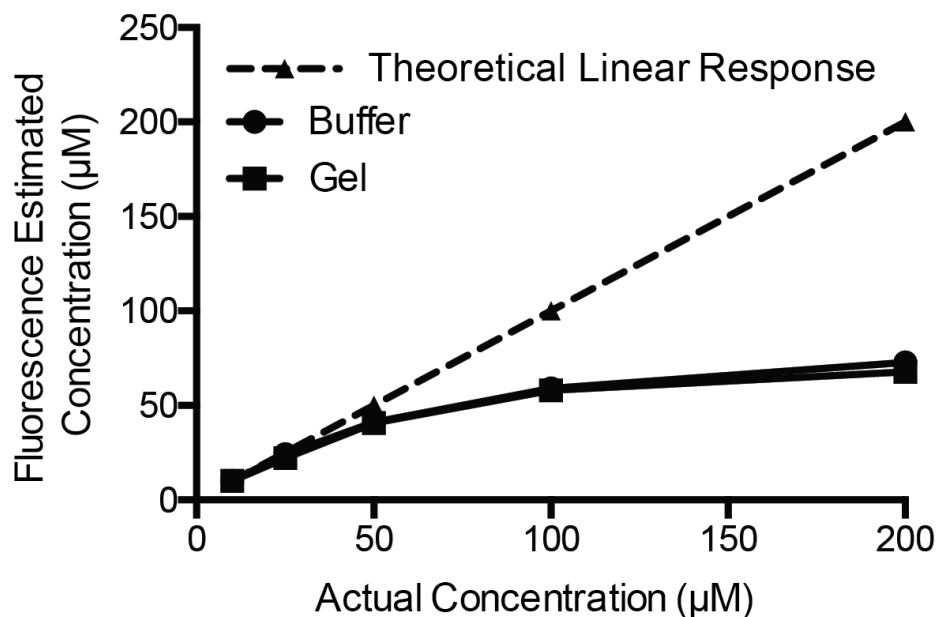

**Supplementary Figure S2:** Quantification of fluorescence signal as a function of fluorophore concentration.

Fluorescence signal is approximately linear up to 50 µM and saturates by 100 µM in buffer and gel conditions. Dashed lines represent the theoretical linear response of fluorescence as a function of concentration. The gels and buffer calibration curves overlap in their associations. All concentrations are reported according to the experimental curve developed and represent lower values of the actual concentrations for values >100 µM.

# Supplementary Figure S3

A

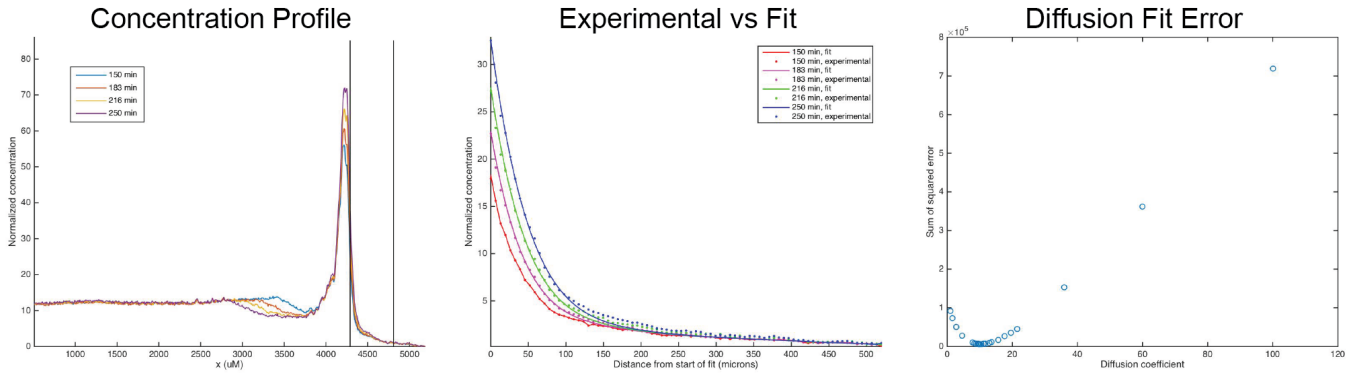

B

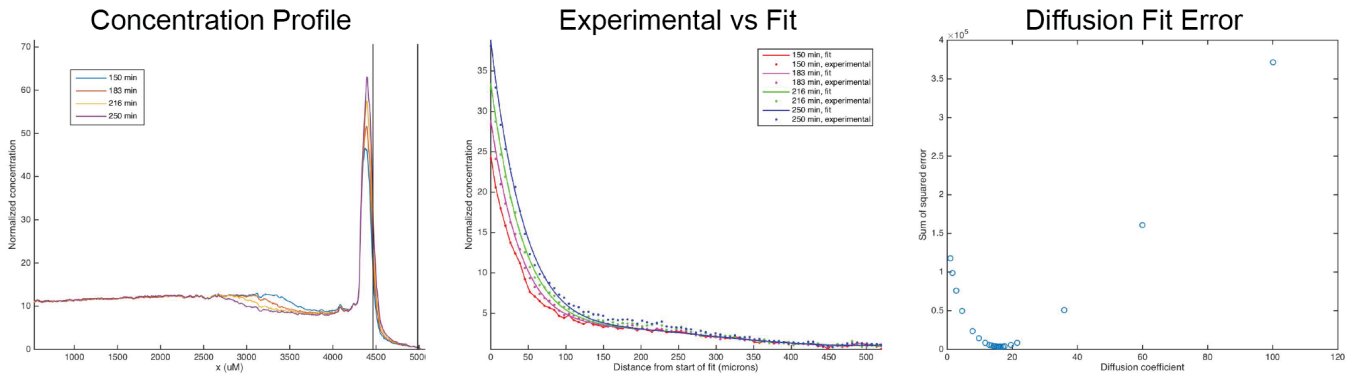

C

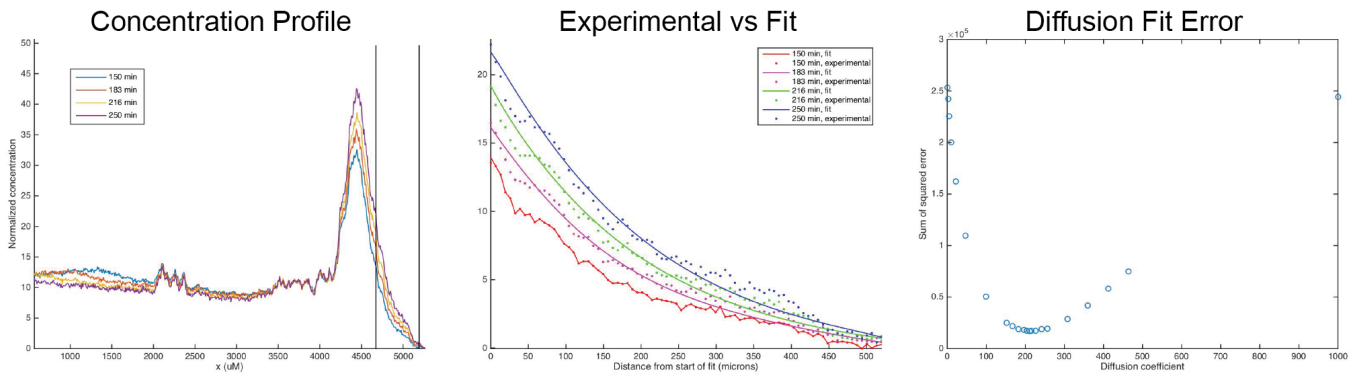

D

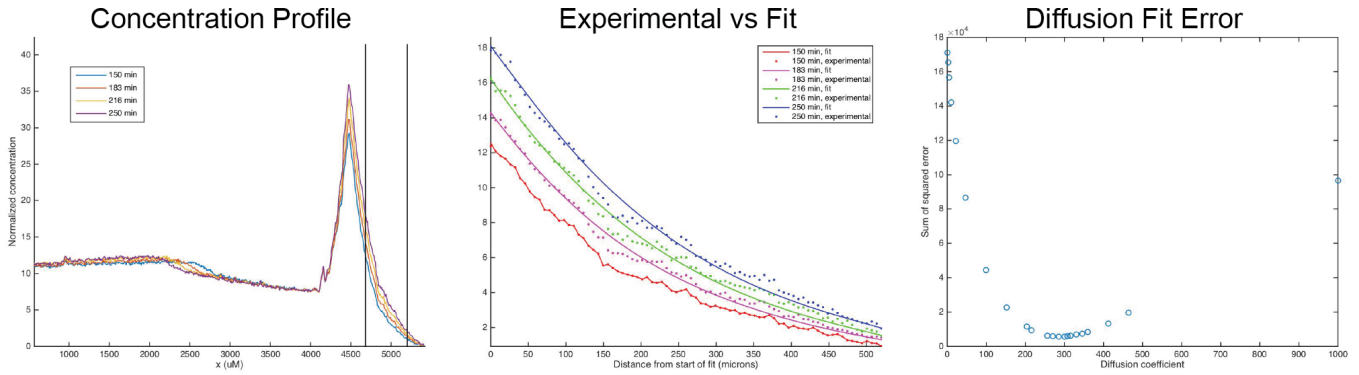

**Supplementary Figure S3:** Analytical process for calculating effective diffusion coefficients. Examples are given for A) NTF2 diffusion into FGAK, B) W7A diffusion into FGAK, C) NTF2 diffusion into FGAE, and D) W7A diffusion into FGAE to show the reliability of the analytical process across multiple gels. The first column represents the region of the concentration profile where the fitting is implemented. The second column contains the actual data (circles) vs. fit (solid line) at four evenly spaced time points. The third column contains the error of the fit as a function of iterated effective diffusion coefficients.

### Supplementary Figure S4

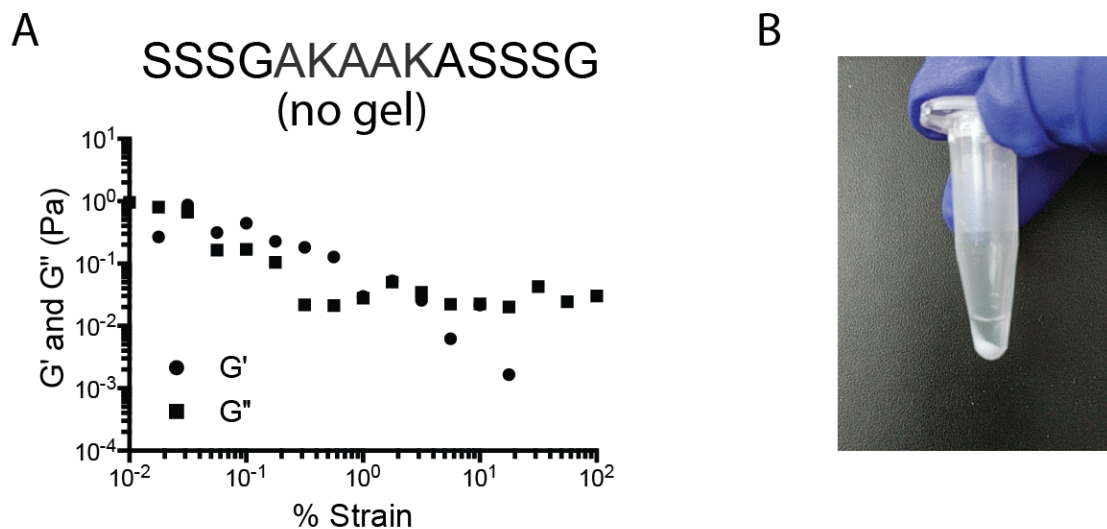

**Supplementary Figure S4:** Verification of F as essential amino acid for self-assembly in FGAK peptides.

A) Frequency sweep of the F→S substitution (FGAK → SGAK) to determine the effect of F on the self-assembly of peptides. The elastic modulus ( $G'$ ) and loss modulus ( $G''$ ) are reported. Note that the measured values are below the sensitivity of the rheometer using the specified cone-plate geometry due to the viscous nature of SGAK peptide solutions. B) Precipitated FGAS peptides in 20 mM NaCl, 20 mM HEPES [pH 7] after gentle centrifugation.

### Supplementary Figure S5

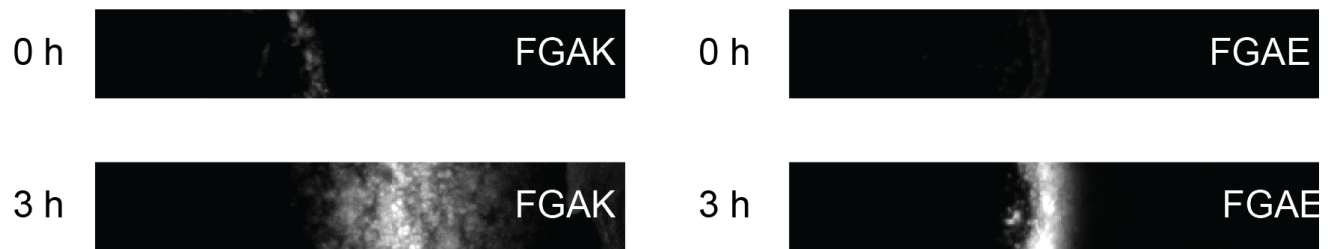

**Supplementary Figure S5:** Verification of hydrophobic domain availability in FG peptide gels. Transport of Nile Red into FGAK and FGAE gels after 0 h and 3 h of incubation. Fluorescence indicates that the dye is able to access hydrophobic environments created by FG domains within the gels. Images are of representative gels from three independent replicates.

## Supplementary Figure S6

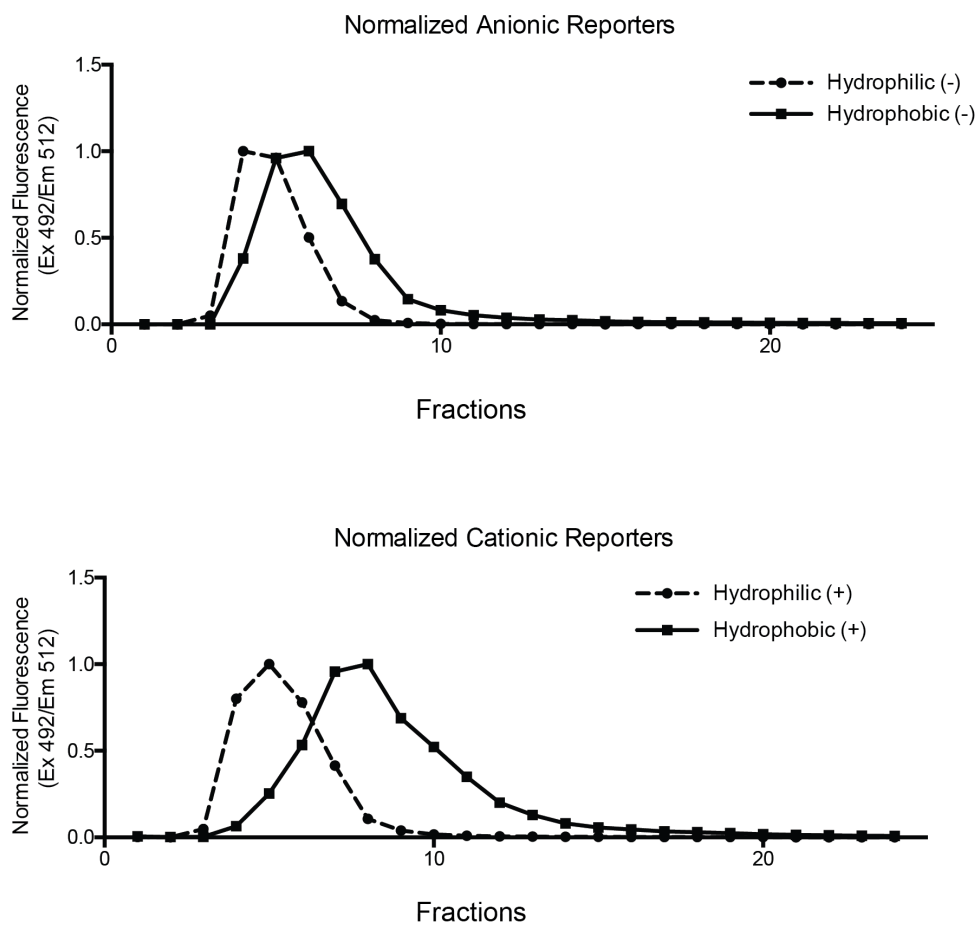

**Supplementary Figure S6:** Fractionation of hydrophilic reporters and their hydrophobic counterparts in phenyl-sepharose columns. Fluorescence signals from each fraction were collected and normalized to the signal with the highest intensity of emission. For both cationic and anionic reporters, the hydrophobic reporters eluted later. This increased retention time reflects stronger binding to phenyl-sepharose beads.

## Supplementary Figure S7

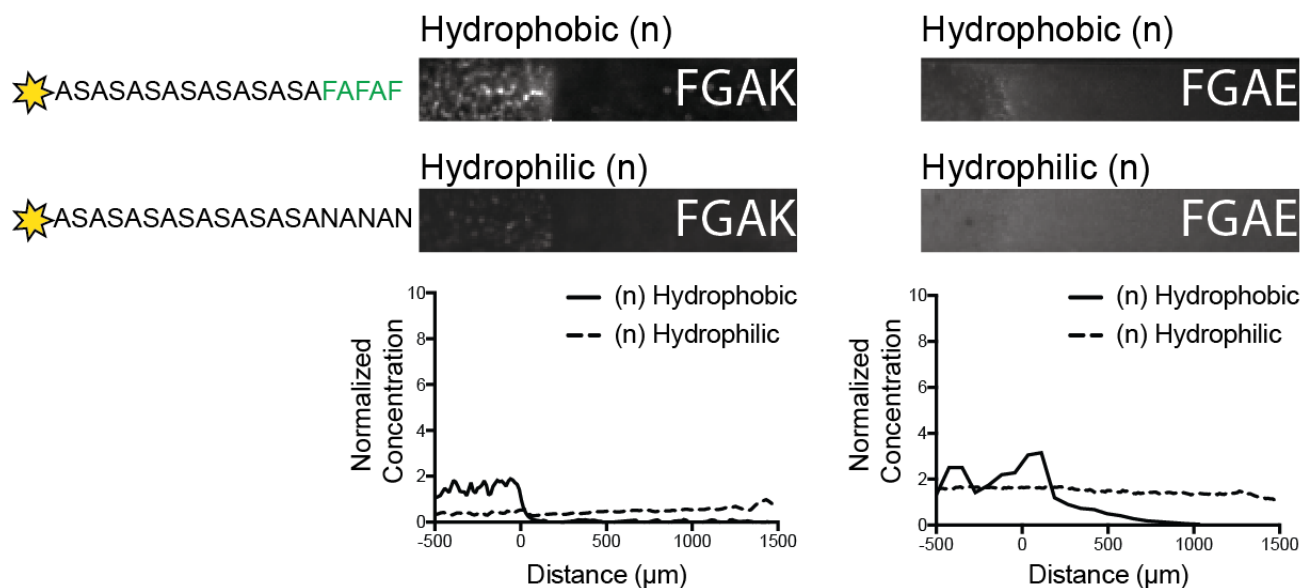

**Supplementary Figure S7:** Diffusion of neutrally charged Hydrophilic (n) and Hydrophobic (n) reporters into cationic FGAK and anionic FGAE gels. Purely neutral reporters interact minimally with the FGAK and FGAE gels regardless of overall hydrophobicity.



## Supplementary Figure S8

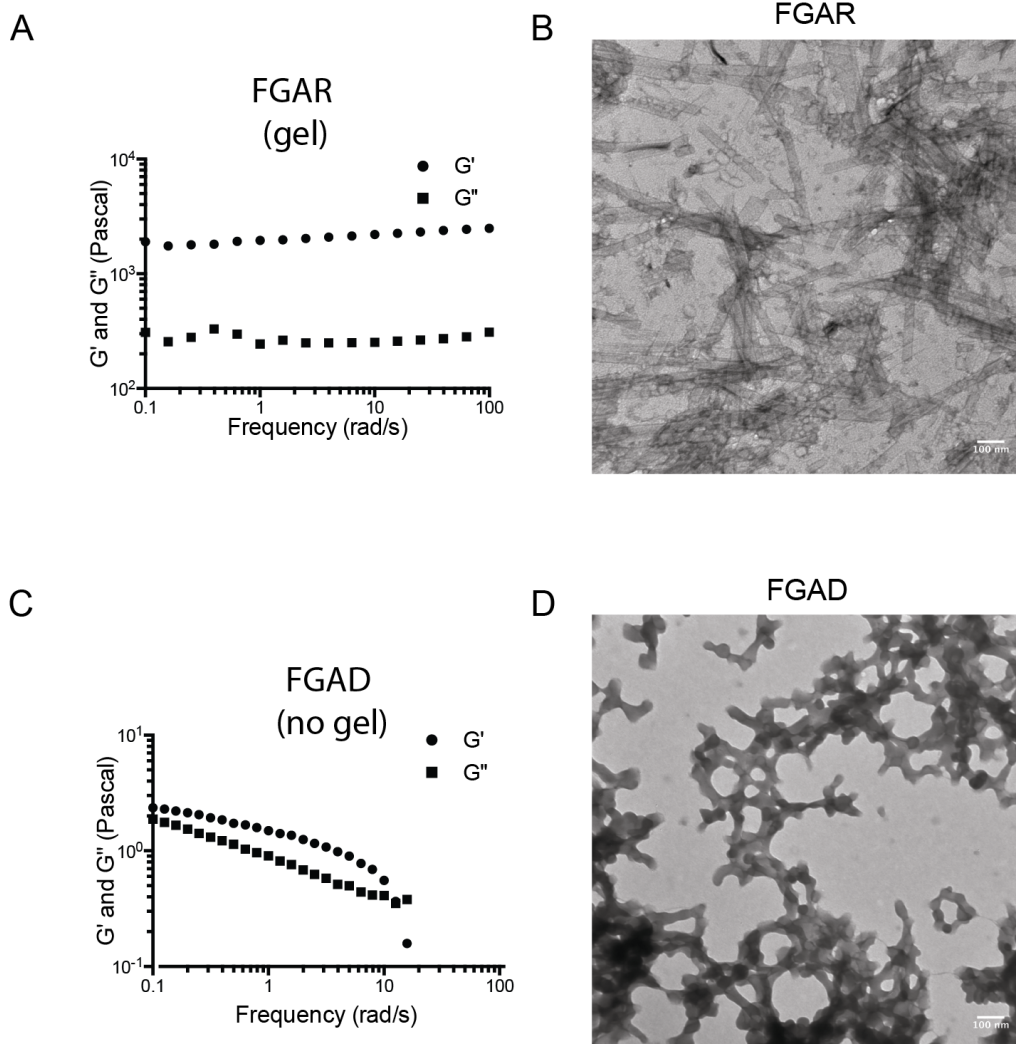

**Supplementary Figure S8:** Affect of amino acid sidechain chemistry on self-assembly and mechanical properties of FG-containing peptides.

A) Frequency sweep of FGAR gel with  $G'$  (storage) and  $G''$  (loss) moduli reported at 2% (w/v) showing the stable self-assembled matrix is maintained when converting from K to R. B) Corresponding image from transmission electron microscopy showing the structural variation of FGAR peptide self-assembly when compared to that of FGAK peptides. C) Frequency sweep of FGAD peptide solution with  $G'$  (storage) and  $G''$  (loss) moduli reported at 2% (w/v) showing that FGAD does not form a gel. D) Corresponding image from transmission electron microscopy showing the amorphous structure of FGAD peptide aggregates.
